# Supplementary material
Source: Springer Nature journal article supplement (https://www.springermedizin.de/resource/supplementary/12885_2014_4810_MOESM6_ESM.pdf/9467350)

**A**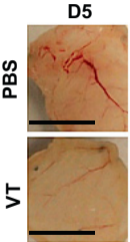**B**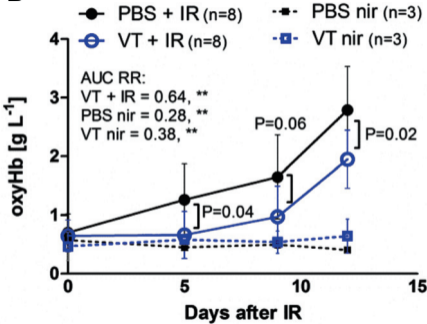

Supplement: MOESM6 [file 9467350]
